# Supplementary material
Source: publisher site journal article supplement (https://www.dovepress.com/article/116392)
Supplement: Supplementary file 1 [file get_supplementary_file.php]

## Supplementary materials

**Table S1** Summary of differentially expressed lncRNAs between cancer and adjacent tissues

| <b>lncRNA</b> | <b>Entrez ID</b> | <b>Normal</b> | <b>Tumor</b> | <b>Fold change</b> | <b>P-value</b> | <b>FDR</b> |
|---------------|------------------|---------------|--------------|--------------------|----------------|------------|
| LINC00588     | 26138            | 0.89          | 63.63        | 71.49438202        | 3.80E-06       | 2.45E-05   |
| SLC26A4-AS1   | 286002           | 3.76          | 56.89        | 15.13031915        | 8.90E-06       | 5.20E-05   |
| BAALC-AS2     | 157556           | 2.05          | 29.99        | 14.62926829        | 1.00E-07       | 1.14E-06   |
| LINC00265     | 349114           | 85.92         | 850.18       | 9.895018622        | <1e-07         | <1e07      |
| UCKL1-AS1     | 100113386        | 6.52          | 61.53        | 9.437116564        | <1e07          | <1e07      |
| LINC00239     | 145200           | 2.17          | 18.35        | 8.456221198        | 8.00E-07       | 6.83E-06   |
| PART1         | 25859            | 31.08         | 248.86       | 8.007078507        | 2.74E-05       | 0.000134   |
| PACRG-AS1     | 285796           | 1.37          | 10.76        | 7.854014599        | <1e07          | <1E-07     |
| KRTAP5-AS1    | 338651           | 12.65         | 91.88        | 7.263241107        | <1e07          | <1e07      |
| CDKN2B-AS1    | 100048912        | 0.75          | 5.36         | 7.146666667        | 6.10E-06       | 3.66E-05   |
| LINC00889     | 158696           | 2.74          | 18.11        | 6.609489051        | 7.00E-07       | 6.09E-06   |
| LINC00669     | 647946           | 1.14          | 7.82         | 6.859649123        | 3.40E-06       | 2.29E-05   |
| LINC00930     | 100144604        | 0.93          | 6.22         | 6.688172043        | 0.0004678      | 0.00153    |
| LINC00598     | 646982           | 1.64          | 8.25         | 5.030487805        | 1.48E-05       | 7.97E-05   |
| LINC00482     | 284185           | 19.23         | 89.46        | 4.652106084        | 5.70E-06       | 3.52E-05   |
| OLMALINC      | 90271            | 56.14         | 253.98       | 4.524047025        | <1e07          | <1e07      |
| LINC00336     | 401253           | 2.97          | 12.69        | 4.272727273        | 3.60E-06       | 2.39E-05   |
| HCG26         | 352961           | 34.32         | 141.93       | 4.13548951         | 5.00E-07       | 4.83E-06   |
| LINC00957     | 255031           | 190.49        | 617.41       | 3.241167515        | 6.00E-07       | 5.55E-06   |
| TMEM51-AS1    | 200197           | 148.27        | 456.88       | 3.081405544        | 4.47E-05       | 2.00E-04   |

|              |           |        |         |             |           |          |
|--------------|-----------|--------|---------|-------------|-----------|----------|
| FAM95B1      | 100133036 | 10.45  | 33.17   | 3.174162679 | 9.71E-05  | 0.000375 |
| ATP6V0E2-AS1 | 401431    | 94.69  | 286.61  | 3.026824374 | 3.22E-05  | 0.000152 |
| ARRDC3-AS1   | 100129716 | 8.73   | 25.46   | 2.916380298 | 7.60E-06  | 4.50E-05 |
| LINC00964    | 157381    | 1.21   | 3.19    | 2.636363636 | 0.0005465 | 0.00175  |
| INE2         | 8551      | 11.16  | 27.65   | 2.477598566 | 0.0005974 | 0.00185  |
| CHKB-AS1     | 100144603 | 5.45   | 13.16   | 2.414678899 | 4.00E-07  | 4.13E-06 |
| HCP5         | 10866     | 757.33 | 1841.51 | 2.431582005 | 9.01E-05  | 0.000354 |
| MIR600HG     | 81571     | 97.78  | 228.46  | 2.336469626 | 0.00019   | 0.000664 |
| LINC00282    | 283521    | 3.12   | 6.87    | 2.201923077 | 4.72E-05  | 0.000207 |
| RBAKDN       | 389458    | 2.17   | 4.86    | 2.239631336 | 0.0001716 | 0.00061  |
| ASMTL-AS1    | 80161     | 35.65  | 77.98   | 2.187377279 | 0.0001058 | 0.000401 |
| INE1         | 8552      | 9.17   | 19.68   | 2.14612868  | 7.00E-07  | 6.09E-06 |
| ZNF252P-AS1  | 286103    | 10.74  | 22.39   | 2.084729981 | <1e07     | <1e07    |
| FBXO22-AS1   | 692224    | 36.21  | 75.5    | 2.085059376 | 3.00E-07  | 3.25E-06 |
| ANP32A-IT1   | 80035     | 1.55   | 3.26    | 2.103225806 | 0.0008286 | 0.00254  |
| LINC01590    | 63914     | 8.01   | 14.74   | 1.84019975  | 4.28E-05  | 0.000194 |
| STARD7-AS1   | 285033    | 32.97  | 59.44   | 1.802851077 | 1.00E-07  | 1.14E-06 |
| SNHG7        | 84973     | 590.56 | 1063.32 | 1.800528312 | 0.0002363 | 0.00082  |
| FAM13A-AS1   | 285512    | 25.48  | 42.75   | 1.677786499 | 0.0007419 | 0.00229  |
| SNHG1        | 23642     | 364.36 | 589.93  | 1.61908552  | 0.0004258 | 0.0014   |
| ST20-AS1     | 283687    | 76     | 115.82  | 1.523947368 | 8.68E-05  | 0.00035  |
| SNHG20       | 654434    | 117.07 | 80.55   | 0.688049885 | 0.0005631 | 0.00177  |
| LINC01128    | 643837    | 123.31 | 78.86   | 0.639526397 | 0.000257  | 0.000875 |
| THAP7-AS1    | 439931    | 102.87 | 63.47   | 0.61699232  | 6.04E-05  | 0.000255 |

|            |           |         |        |             |           |          |
|------------|-----------|---------|--------|-------------|-----------|----------|
| LINC00909  | 400657    | 305.28  | 183.3  | 0.60043239  | 8.12E-05  | 0.000334 |
| ILF3-AS1   | 147727    | 1443.94 | 846.72 | 0.586395557 | 1.33E-05  | 7.20E-05 |
| LINC00339  | 29092     | 290.38  | 168.51 | 0.580308561 | <1e07     | 1.14E-06 |
| ZNF674-AS1 | 401588    | 128.05  | 72.51  | 0.566263178 | 0.000903  | 0.00273  |
| NUTM2A-AS1 | 728190    | 195.94  | 108.28 | 0.552618148 | 0.0002583 | 0.000875 |
| ZEB1-AS1   | 220930    | 187.88  | 99.94  | 0.531935278 | 2.60E-06  | 1.86E-05 |
| DNMBP-AS1  | 100188954 | 4.59    | 2.41   | 0.525054466 | 0.0003889 | 0.0013   |
| LOH12CR2   | 503693    | 88.02   | 44.83  | 0.509316065 | 2.54E-05  | 0.000125 |
| LINC00910  | 100130581 | 74.53   | 37.9   | 0.508520059 | <1e07     | 1.14E-06 |
| LINC00526  | 147525    | 91.24   | 46.36  | 0.508110478 | 2.07E-05  | 0.000106 |
| WEE2-AS1   | 285962    | 69.64   | 34.92  | 0.501435956 | 0.0003588 | 0.00121  |
| PWARSN     | 347746    | 243.19  | 118.94 | 0.48908261  | 0.0005357 | 0.00172  |
| LINC00883  | 344595    | 151.22  | 73.94  | 0.488956487 | 0.0001318 | 0.00048  |
| ZNF205-AS1 | 81854     | 19.28   | 9.36   | 0.485477178 | 1.30E-06  | 1.03E-05 |
| HCG18      | 414777    | 553     | 267.36 | 0.483471971 | <1e-07    | 1.14E-06 |
| ASH1L-AS1  | 645676    | 60.21   | 29.13  | 0.483806677 | 7.00E-07  | 6.09E-06 |
| PSMD5-AS1  | 253039    | 400.02  | 192.64 | 0.481575921 | 3.49E-05  | 0.000161 |
| DLGAP1-AS1 | 649446    | 246.35  | 115.85 | 0.470265882 | 3.72E-05  | 0.00017  |
| HCG4B      | 80868     | 7.7     | 3.61   | 0.468831169 | 0.0001023 | 0.000392 |
| ATP1A1-AS1 | 84852     | 138.6   | 64.79  | 0.467460317 | 2.10E-06  | 1.53E-05 |
| DANCR      | 57291     | 1391.66 | 637.37 | 0.457992613 | 2.39E-05  | 0.000121 |
| LINC00467  | 84791     | 179.48  | 80.64  | 0.449297972 | 3.33E-05  | 0.000156 |
| ST7-AS1    | 93653     | 79.96   | 34.79  | 0.435092546 | <1e-07    | <1e-07   |
| LINC00998  | 401397    | 1041.02 | 450.55 | 0.43279668  | <1e-07    | 1.14E-06 |

|              |           |        |        |             |           |          |
|--------------|-----------|--------|--------|-------------|-----------|----------|
| FLVCR1-AS1   | 642946    | 32.24  | 13.93  | 0.43207196  | 9.90E-06  | 5.64E-05 |
| A2M-AS1      | 144571    | 67.92  | 29.01  | 0.427120141 | 9.00E-07  | 7.40E-06 |
| XIST         | 7503      | 268.61 | 114.26 | 0.425375079 | 1.60E-06  | 1.20E-05 |
| LINC00937    | 389634    | 2.74   | 1.16   | 0.423357664 | 0.0004125 | 0.00137  |
| LINC00936    | 338758    | 106.51 | 44.88  | 0.421368886 | 8.26E-05  | 0.000336 |
| MAFG-AS1     | 92659     | 52.44  | 21.98  | 0.41914569  | 6.00E-05  | 0.000255 |
| GHRLOS       | 100126793 | 10.07  | 4.21   | 0.418073486 | 8.98E-05  | 0.000354 |
| BAIAP2-AS1   | 440465    | 774.83 | 321.16 | 0.414490921 | 2.70E-06  | 1.90E-05 |
| WWC2-AS2     | 152641    | 46.56  | 18.77  | 0.403135739 | 0.0001171 | 0.000433 |
| MIR503HG     | 84848     | 50.25  | 19.32  | 0.384477612 | 1.14E-05  | 6.25E-05 |
| FAM66C       | 440078    | 47.54  | 18.16  | 0.38199411  | 5.80E-06  | 3.53E-05 |
| LINC00346    | 283487    | 119.25 | 44.78  | 0.375513627 | 0.0005568 | 0.00177  |
| LINC00472    | 79940     | 391.02 | 145.55 | 0.372231599 | 3.70E-06  | 2.42E-05 |
| MIR17HG      | 407975    | 12.65  | 4.55   | 0.359683794 | 2.80E-06  | 1.91E-05 |
| LINC00324    | 284029    | 69.25  | 24.65  | 0.355956679 | <1e-07    | <1e-07   |
| MIR143HG     | 728264    | 118.17 | 41.61  | 0.352119827 | 4.95E-05  | 0.000213 |
| TIPARP-AS1   | 100287227 | 10.5   | 3.66   | 0.348571429 | 1.14E-05  | 6.25E-05 |
| LINC00094    | 266655    | 955.9  | 325.32 | 0.340328486 | <1e-07    | <1e-07   |
| RPL34-AS1    | 285456    | 6.38   | 2.12   | 0.332288401 | 0.0001636 | 0.000586 |
| LINC00173    | 100287569 | 5.97   | 1.97   | 0.32998325  | 2.48E-05  | 0.000124 |
| LINC01011    | 401232    | 44.53  | 14.66  | 0.329216259 | <1e-07    | <1e-07   |
| C21orf62-AS1 | 54067     | 20.36  | 6.67   | 0.327603143 | 1.00E-07  | 1.14E-06 |
| CECR5-AS1    | 100130717 | 6.24   | 2.05   | 0.328525641 | 9.43E-05  | 0.000367 |
| URB1-AS1     | 84996     | 216.89 | 69.51  | 0.320485038 | <1e-07    | <1e-07   |

|             |           |        |        |             |           |          |
|-------------|-----------|--------|--------|-------------|-----------|----------|
| LINC01341   | 149134    | 10.25  | 3.27   | 0.31902439  | 0.0001124 | 0.000423 |
| LINC01144   | 400752    | 69.15  | 21.98  | 0.317859725 | 3.00E-07  | 3.25E-06 |
| LINC00310   | 114036    | 10.82  | 3.43   | 0.317005545 | 4.68E-05  | 0.000207 |
| CYP1B1-AS1  | 285154    | 8.6    | 2.7    | 0.313953488 | 1.72E-05  | 8.88E-05 |
| LINC01547   | 84536     | 65.5   | 19.97  | 0.304885496 | 4.70E-06  | 2.98E-05 |
| LBX2-AS1    | 151534    | 134.18 | 40.36  | 0.300789984 | 8.95E-05  | 0.000354 |
| LINC00476   | 100128782 | 383.7  | 110.53 | 0.288063591 | <1e-07    | <1e-07   |
| LINC01558   | 26238     | 22.2   | 6.21   | 0.27972973  | 1.08E-05  | 6.07E-05 |
| LINC01119   | 100134259 | 8.36   | 2.16   | 0.258373206 | <1e-07    | <1e-07   |
| AGPAT4-IT1  | 79992     | 3.45   | 0.89   | 0.257971014 | 0.0001452 | 0.000524 |
| PSMG3-AS1   | 114796    | 383.59 | 96.88  | 0.252561329 | <1e-07    | <1e-07   |
| LINC00240   | 100133205 | 8.75   | 2.19   | 0.250285714 | 1.60E-06  | 1.20E-05 |
| WDFY3-AS2   | 404201    | 254.91 | 61.96  | 0.24306618  | 2.80E-06  | 1.91E-05 |
| LINC00961   | 158376    | 127.41 | 29.87  | 0.234439997 | <1e-07    | 1.14E-06 |
| C1RL-AS1    | 283314    | 145.32 | 33.8   | 0.232590146 | 1.00E-07  | 1.14E-06 |
| CEP83-AS1   | 144486    | 18.83  | 4.29   | 0.227827934 | 1.90E-06  | 1.41E-05 |
| PAX8-AS1    | 654433    | 42.17  | 9.26   | 0.219587384 | 1.00E-07  | 1.14E-06 |
| HOTAIR      | 100124700 | 9.24   | 2.03   | 0.21969697  | 5.00E-06  | 3.13E-05 |
| TMEM254-AS1 | 219347    | 56.36  | 12.27  | 0.217707594 | <1e-07    | <1e-07   |
| MLLT4-AS1   | 653483    | 39.73  | 8.55   | 0.215202618 | <1e-07    | <1e-07   |
| SOX2-OT     | 347689    | 6.85   | 1.46   | 0.213138686 | 9.70E-06  | 5.59E-05 |
| MIR99AHG    | 388815    | 127.73 | 26.57  | 0.208016911 | 8.06E-05  | 0.000334 |
| NR2F1-AS1   | 441094    | 205.24 | 39.46  | 0.192262717 | <1e-07    | <1e-07   |
| LINC00882   | 100302640 | 24.91  | 4.56   | 0.183059012 | 3.00E-05  | 0.000143 |

|             |           |        |       |             |           |          |
|-------------|-----------|--------|-------|-------------|-----------|----------|
| LINC00242   | 401288    | 5.01   | 0.92  | 0.183632735 | 0.0001844 | 0.00065  |
| LINC01554   | 202299    | 17.95  | 3.06  | 0.170473538 | 1.53E-05  | 8.09E-05 |
| CASC2       | 255082    | 135.55 | 22.88 | 0.168793803 | <1e-07    | <1e-07   |
| LINC00312   | 29931     | 30.8   | 4.94  | 0.16038961  | <1e-07    | <1e-07   |
| TINCR       | 257000    | 30.49  | 4.73  | 0.15513283  | 9.00E-07  | 7.40E-06 |
| LINC00092   | 100188953 | 17.48  | 2.11  | 0.120709382 | <1e-07    | <1e-07   |
| HCG4        | 54435     | 110.57 | 13.32 | 0.120466673 | <1e-07    | <1e-07   |
| HNF1A-AS1   | 283460    | 42.28  | 4.94  | 0.116840114 | 0.0001282 | 0.00047  |
| LOC145837   | 145837    | 51.18  | 5.82  | 0.113716295 | 1.50E-06  | 1.17E-05 |
| MEG3        | 55384     | 25.74  | 2.83  | 0.10994561  | 6.00E-07  | 5.55E-06 |
| LINC00839   | 84856     | 137.79 | 13.3  | 0.096523695 | 0.0001146 | 0.000428 |
| LOC285768   | 285768    | 13.25  | 1.27  | 0.095849057 | 0.0005679 | 0.00178  |
| ADORA2A-AS1 | 646023    | 34.64  | 2.91  | 0.084006928 | 1.20E-06  | 9.69E-06 |
| GATA3-AS1   | 399717    | 184.72 | 15.01 | 0.08125812  | 4.77E-05  | 0.000208 |
| LINC00924   | 145820    | 257.89 | 20.63 | 0.079995347 | <1e-07    | <1e-07   |
| BRE-AS1     | 100302650 | 809.36 | 64.02 | 0.079099535 | 1.00E-07  | 1.14E-06 |
| UCA1        | 652995    | 14.36  | 1.12  | 0.077994429 | 8.13E-05  | 0.000334 |
| EGOT        | 100126791 | 122.39 | 9.42  | 0.076967072 | <1e-07    | 1.14E-06 |
| LINC00908   | 284276    | 12.85  | 0.96  | 0.074708171 | <1e-07    | <1e-07   |
| LINC00671   | 388387    | 101.52 | 6.48  | 0.063829787 | <1e-07    | <1e-07   |
| LINC00271   | 100131814 | 45.98  | 2.57  | 0.055893867 | <1e-07    | <1e-07   |
| COL18A1-AS1 | 378832    | 47.28  | 2.39  | 0.050549915 | 5.00E-07  | 4.83E-06 |
| LINC01550   | 388011    | 74.63  | 3.22  | 0.043146188 | 4.00E-07  | 4.13E-06 |
| WT1-AS      | 51352     | 18.5   | 0.6   | 0.032432432 | 5.00E-07  | 4.83E-06 |

|            |        |        |      |             |          |          |
|------------|--------|--------|------|-------------|----------|----------|
| LINC01139  | 339535 | 362.32 | 2.11 | 0.005823581 | 1.67E-05 | 8.72E-05 |
| LINC00473  | 90632  | 219.08 | 1.1  | 0.005020997 | <1e-07   | <1e-07   |
| LHFPL3-AS2 | 723809 | 234.39 | 1.14 | 0.004863689 | <1e-07   | <1e-07   |

---

**Abbreviations:** FDR: false discovery rate; lncRNA, long noncoding RNA.

**Table S2** Differentially expressed microRNAs between cancer and adjacent tissues with fold change  $\geq 5$ ,  $P < 0.001$ 

| <b>MicroRNA</b> | <b>Normal</b> | <b>Tumor</b> | <b>Fold change</b> | <b>P-value</b> | <b>FDR</b> |
|-----------------|---------------|--------------|--------------------|----------------|------------|
| hsa-mir-891a    | 54.54         | 6433.58      | 117.9607627        | <1e-07         | <1e-07     |
| hsa-mir-221     | 127.83        | 1393.57      | 10.9017445         | <1e-07         | <1e-07     |
| hsa-mir-222     | 34.97         | 340.03       | 9.723477266        | <1e-07         | <1e-07     |
| hsa-mir-874     | 31.79         | 263.89       | 8.301038062        | <1e-07         | <1e-07     |
| hsa-mir-187     | 15.99         | 128.41       | 8.030644153        | 0.0001303      | 0.000386   |
| hsa-mir-96      | 3.74          | 27.01        | 7.221925134        | <1e-07         | <1e-07     |
| hsa-mir-182     | 2824.9        | 19895.56     | 7.042925413        | <1e-07         | 0.00000063 |
| hsa-mir-183     | 1022.37       | 6374.99      | 6.235501824        | 0.0000003      | 0.00000166 |
| hsa-mir-651     | 2.12          | 11.9         | 5.613207547        | 0.0000145      | 0.0000505  |
| hsa-mir-582     | 184.02        | 923.65       | 5.019291381        | <1e-07         | <1e-07     |
| hsa-mir-9-2     | 597.12        | 119.37       | 0.199909566        | 0.0009766      | 0.0022     |
| hsa-mir-217     | 32.13         | 6.11         | 0.193223432        | 0.0001985      | 0.000213   |
| hsa-mir-9-1     | 613.72        | 118.69       | 0.193394382        | 0.0006961      | 0.00163    |
| hsa-mir-335     | 43.94         | 8.22         | 0.187073282        | <1e-07         | 0.00000063 |
| hsa-mir-196a-1  | 456.46        | 82.94        | 0.181702668        | <1e-07         | <1e-07     |
| hsa-mir-381     | 18.35         | 3.29         | 0.179291553        | <1e-07         | <1e-07     |
| hsa-mir-190     | 17.38         | 2.69         | 0.154775604        | 0.0000007      | 0.00000344 |
| hsa-mir-134     | 96.66         | 14.43        | 0.149286158        | <1e-07         | <1e-07     |
| hsa-mir-127     | 402.26        | 56.19        | 0.139685775        | <1e-07         | <1e-07     |
| hsa-mir-379     | 275.38        | 36.68        | 0.133197763        | <1e-07         | <1e-07     |
| hsa-mir-130a    | 112.46        | 13.6         | 0.120931887        | <1e-07         | <1e-07     |
| hsa-mir-194-1   | 594           | 69.93        | 0.117727273        | 0.0000004      | 0.00000216 |



|                |         |        |             |           |            |
|----------------|---------|--------|-------------|-----------|------------|
| hsa-mir-194-2  | 699.88  | 75.72  | 0.108189975 | 0.0000002 | 0.00000117 |
| hsa-mir-136    | 24.14   | 2.59   | 0.107290804 | <1e-07    | <1e-07     |
| hsa-mir-199a-1 | 1004.4  | 98.66  | 0.098227798 | <1e-07    | <1e-07     |
| hsa-mir-199a-2 | 1771.14 | 169.6  | 0.095757535 | <1e-07    | <1e-07     |
| hsa-mir-192    | 4493.73 | 414.7  | 0.092284138 | 0.0000005 | 0.00000257 |
| hsa-mir-199b   | 2654.09 | 224.32 | 0.084518611 | <1e-07    | <1e-07     |
| hsa-mir-455    | 423.35  | 27.34  | 0.064580135 | <1e-07    | <1e-07     |
| hsa-mir-675    | 73.02   | 4.04   | 0.055327308 | 0.0000005 | 0.00000257 |
| hsa-mir-204    | 587.92  | 6.8    | 0.011566199 | <1e-07    | <1e-07     |

---

**Abbreviation:** FDR, false discovery rate.

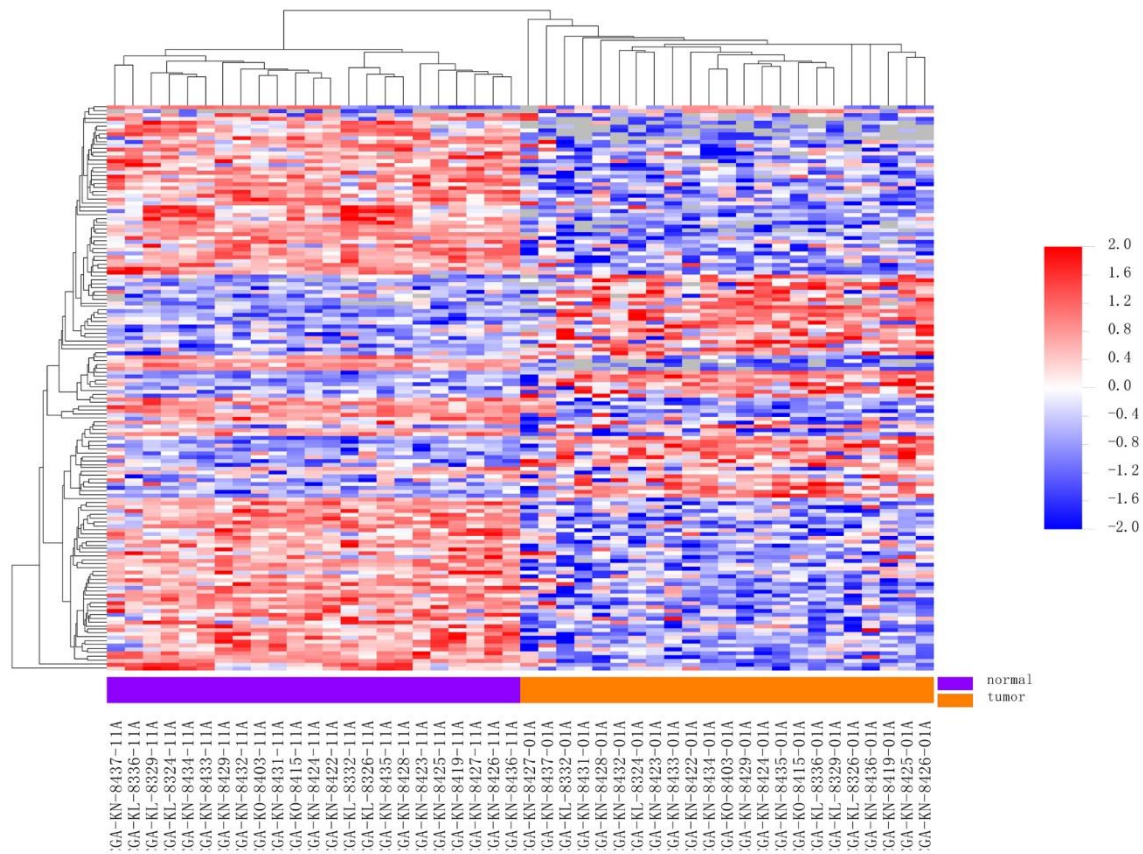

**Figure S1** Unsupervised hierarchical cluster analysis of 143 differentially expressed lncRNAs with paired samples.

**Abbreviation:** lncRNA, long noncoding RNA.



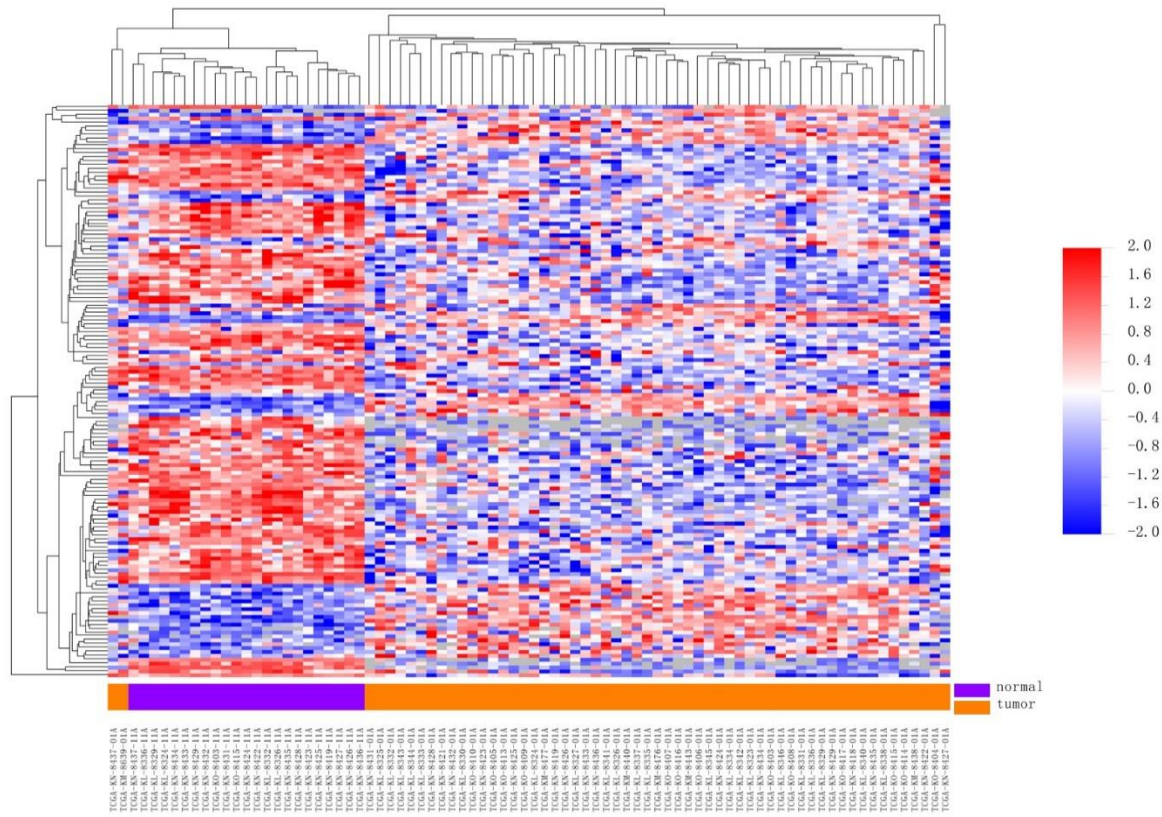

**Figure S2** Unsupervised hierarchical cluster analysis of 143 differentially expressed lncRNAs with unpaired samples.

**Abbreviation:** lncRNA, long noncoding RNA.
